# Supplementary material for: Comparative proteomic profiling of Hodgkin lymphoma cell lines
Source: Royal Society of Chemistry journal article supplement (doi:10.1039/c5mb00654f), 2015-11-12
Supplement: c5mb00654f1.pdf [file c5mb00654f1.pdf]

## Comparative proteomic profiling of Hodgkin lymphoma cell lines

**Supplementary Table 1.** List of antibodies used in western blotting and flow-cytometry.

| <b>Western blotting</b>            |                                       |                 |
|------------------------------------|---------------------------------------|-----------------|
| <b>Antibody name</b>               | <b>Company</b>                        | <b>Dilution</b> |
| Anti-Cofilin                       | Santa Cruz Biotechnology (sc-33779)   | 1:1000          |
| Anti-phospho Cofilin (ser3)        | Santa Cruz Biotechnology (sc-21867-R) | 1:1000          |
| Anti-Ezrin                         | Santa Cruz Biotechnology (sc-20773)   | 1:1000          |
| Anti-phospho Ezrin (Tyr354)        | Santa Cruz Biotechnology (sc-101678)  | 1:500           |
| Anti-LDHB                          | Santa Cruz Biotechnology (sc-133731)  | 1:1000          |
| Anti-Monocarboxylate transporter 1 | Abcam (NBP2-17242)                    | 1:2000          |
| Anti-HSP70                         | Sigma (H51747)                        | 1:2000          |
| Anti-Peroxiredoxin 1               | Santa Cruz Biotechnology (sc-7381)    | 1:1000          |
| Anti-Peroxiredoxin 2               | Santa Cruz Biotechnology (sc-33572)   | 1:1000          |
| Anti-Peroxiredoxin 6               | Santa Cruz Biotechnology (sc-393024)  | 1:1000          |
| Anti-Rock                          | Santa Cruz Biotechnology (sc-5560)    | 1:1000          |
| Anti-Src                           | Cell Signaling (2110)                 | 1:1000          |
| Anti- $\alpha$ Tubulin             | Santa Cruz Biotechnology (sc-23948)   | 1:2000          |
| <b>Flow cytometry</b>              |                                       |                 |
| <b>Antibody name</b>               | <b>Company</b>                        | <b>Dilution</b> |
| Anti-CD19-FITC                     | BD Biosciences (clone SJ25C1)         | 1:5             |
| Anti-CD20-FITC                     | BD Biosciences (clone L27)            | 1:5             |
| Anti-CD25-APC                      | BD Biosciences (clone 2A3)            | 1:20            |
| Anti-CD32-APC                      | BD Biosciences (clone FLI8.26)        | 1:5             |
| Anti-CD38-FITC                     | BD Biosciences (clone HB7)            | 1:5             |
| Anti-CD44-APC                      | BD Biosciences (clone G44-26)         | 1:5             |
| Anti-CD44v6-APC                    | R&D Systems (clone 2F10)              | 1:10            |
| Anti-CD58-APC                      | Miltenyi Biotec (clone TS2/9)         | 1:11            |
| Anti-CD90-FITC                     | BD Biosciences (clone 5E10)           | 1:5             |
| Anti-CD99-FITC                     | BD Biosciences (clone TŪ12)           | 1:5             |
| Anti-CD123-FITC                    | BD Biosciences (clone 7G3)            | 1:5             |

**Supplementary Table 2.** Node Explorer by NetworkAnalyst.

| <b>UNIPROT ID</b> | <b>Name</b>                           | <b>Degree</b> | <b>Betweenness</b> |
|-------------------|---------------------------------------|---------------|--------------------|
| P19338            | Nucleolin (NCL)                       | 51            | 1534.81            |
| P15311            | Ezrin (EZR)                           | 27            | 1061.51            |
| P08865            | 40S ribosomal protein SA (RPSA)       | 36            | 1040.16            |
| P63104            | 14-3-3 protein zeta/delta<br>(YWHAZ)  | 27            | 979.04             |
| P07237            | Protein disulfide-isomerase<br>(P4HB) | 30            | 923.53             |
| P13639            | Elongation factor 2 (EEF2)            | 41            | 901.19             |

NOTE: highly interconnected hub nodes are shown. NetworkAnalyst provides two widely used topological measures—degree and betweenness centrality. The degree of a node is the number of connections it has to other nodes. The betweenness centrality measures number of shortest paths going through the node.

**Supplementary Figure 1.** Graphical representation of the experimental workflow. The overall process consists of a number of steps, which include protein separation by 2-DE, identification by MS/MS, and analysis by flow cytometry. Data were processed by bioinformatics tools to identify significant enriched pathways or networks.

**Supplementary Figure 2.** Proteasome KEGG pathway map. List of identified members include: Proteasome subunit beta type-3 (PSB3), Proteasome activator complex subunit 2

(PSME2), Proteasome subunit beta type-2 (PSB2), Proteasome subunit beta type-8 (PSB8), and 26S proteasome regulatory subunit 7 (PRS7).

**Supplementary Figure 3.** Hematopoietic cell lineage KEGG pathway map. List of identified members include: CD19 molecule, CD38 molecule, CD44 molecule, CD25 molecule (interleukin 2 receptor, alpha), CD123 molecule (interleukin 3 receptor, alpha), CD20 molecule (membrane-spanning 4-domains, subfamily A, member 1).

**Supplementary Figure 4.** NetworkAnalyst network of differentially expressed proteins. a) Main hub nodes are highlighted. b) A zoom in of the ezrin node is shown.
