# Supplementary figures and images for: Comparative proteomic profiling of Hodgkin lymphoma cell lines
Source: Royal Society of Chemistry journal article supplement (doi:10.1039/c5mb00654f), 2015-11-12

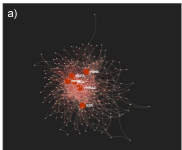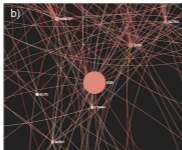

Supplement: c5mb00654f2.pdf [file c5mb00654f2.pdf]

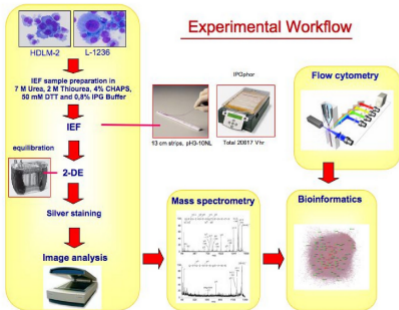

Supplement: c5mb00654f3.pdf [file c5mb00654f3.pdf]
